# Supplementary material for: Effect of conduction band potential on cocatalyst-free plasmonic H2 evolution over Au loaded on Sr2+-doped CeO2
Source: Royal Society of Chemistry journal article supplement (doi:10.1039/c9cy00673g), 2019-01-01
Supplement: c9cy00673g1.pdf [file c9cy00673g1.pdf]

## Electronic Supplementary Information

### **Effect of conduction band potential on cocatalyst-free plasmonic H<sub>2</sub> evolution over Au loaded on Sr<sup>2+</sup>-doped CeO<sub>2</sub>**

Eri Fudo<sup>a</sup>, Atsuhiko Tanaka<sup>b,c</sup>, Hiroshi Kominami<sup>\*b</sup>

*<sup>a</sup>Department of Molecular and Material Engineering, Graduate School of Science and Engineering Kindai University, Kowakae, Higashiosaka, Osaka 577-8502, Japan*

*<sup>b</sup>Department of Applied Chemistry, Faculty of Science and Engineering Kindai University, Kowakae, Higashiosaka, Osaka 577-8502, Japan*

*<sup>c</sup>Precursory Research for Embryonic Science and Technology (PRESTO), Japan Science and Technology Agency (JST), 4-1-8 Honcho, Kawaguchi 332-0012, Japan*

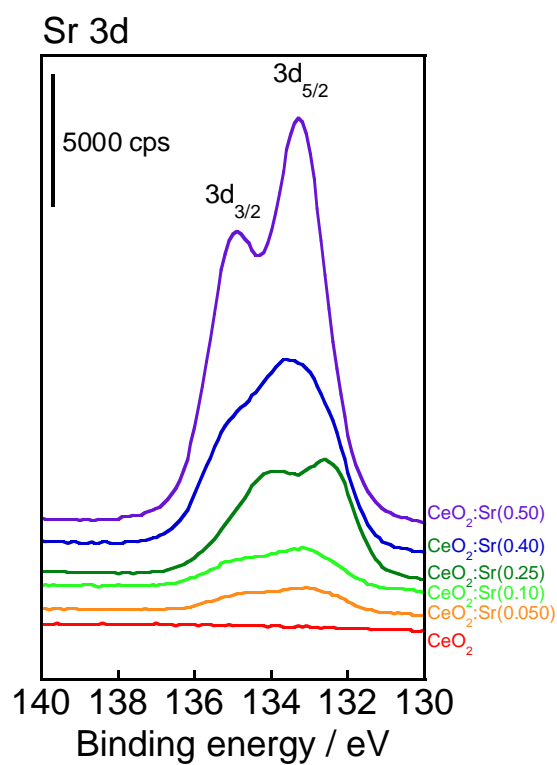

**Figure S1** XPS spectra of  $\text{CeO}_2$  (undoped,  $x=0$ ) and  $\text{CeO}_2:\text{Sr}(x)$  with different mole fractions ( $x=0.050, 0.10, 0.25, 0.40$  and  $0.50$ ) around Sr 3d components.

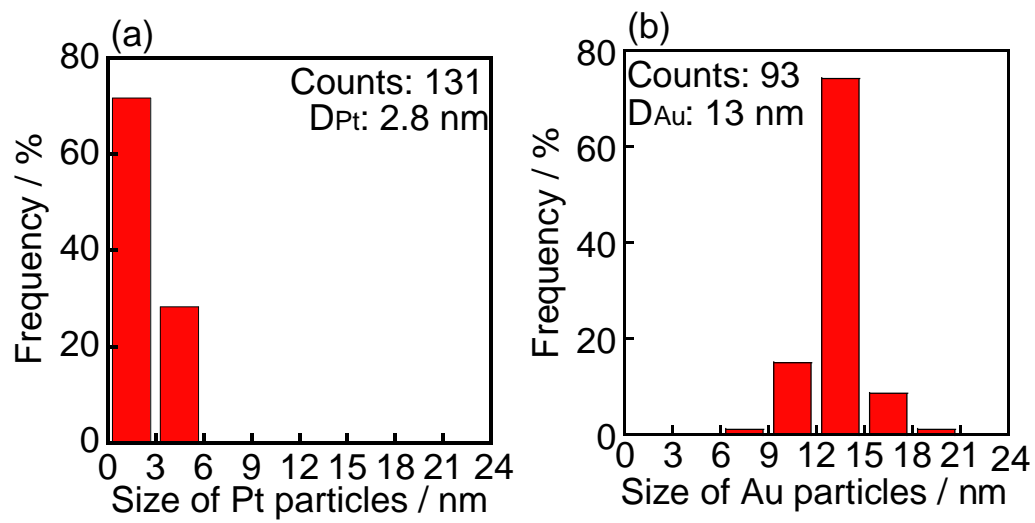

**Figure S2** Size distributions of (a) Pt nanoparticles on  $\text{CeO}_2\text{:Sr}(0.25)\text{-Pt}(0.5)$  and (b) Au nanoparticles on  $\text{Au}(1.0)/\text{CeO}_2\text{:Sr}(0.25)$ .

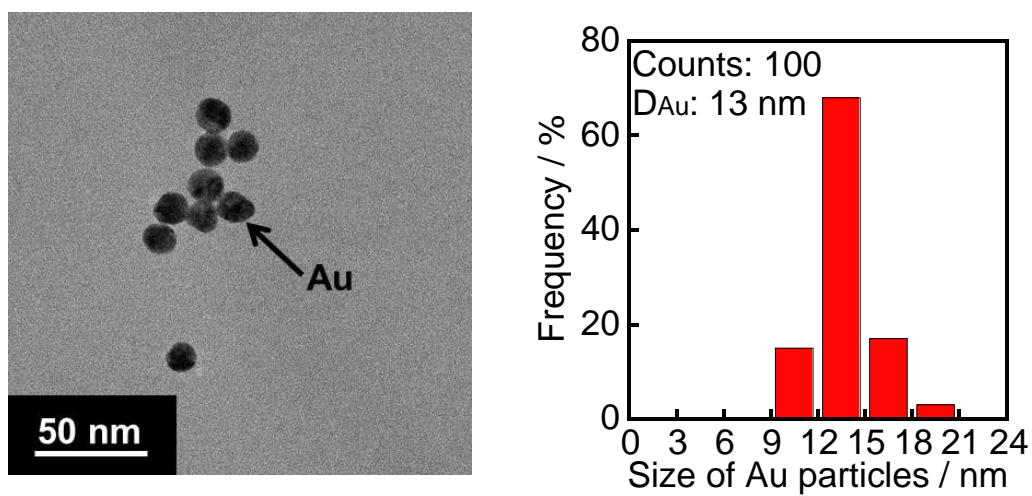

**Figure S3** TEM photographs (left) and size distributions (right) of colloidal Au nanoparticles

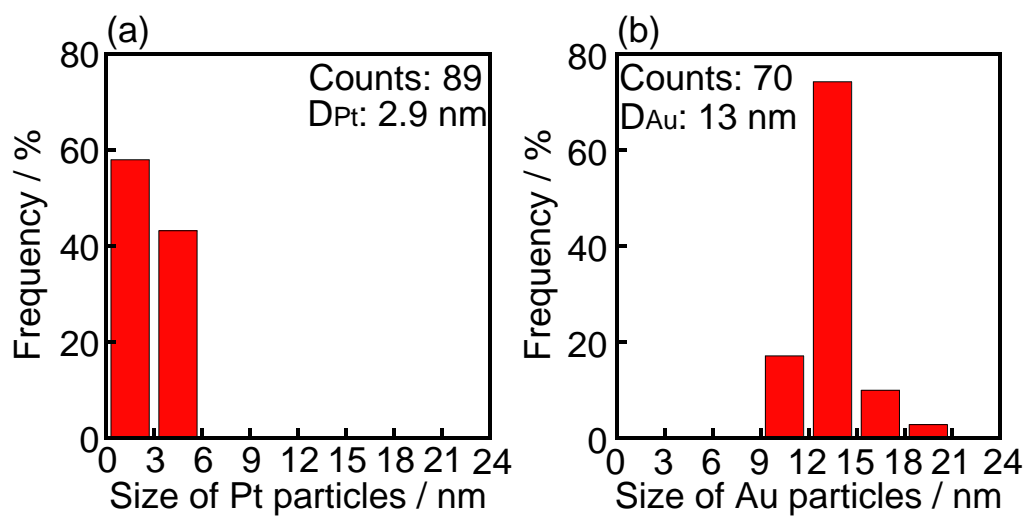

**Figure S4** Size distributions of (a) Pt nanoparticles on Au/CeO<sub>2</sub>:Sr(0.25)-Pt(0.5) and (b) colloidal Au nanoparticles on Au/CeO<sub>2</sub>:Sr(0.25)-Pt(0.5).

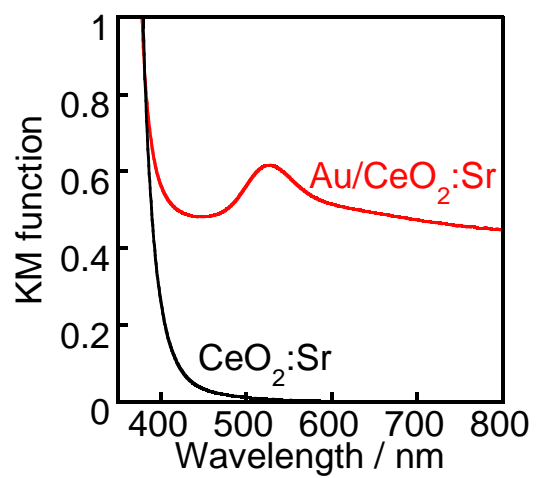

**Figure S5** Photoabsorption spectra of CeO<sub>2</sub>:Sr(0.25) (black line) and Au(1.0)/CeO<sub>2</sub>:Sr(0.25) (red line).

**Table S1** Rates of formation of H<sub>2</sub> from 2-propanol in aqueous suspensions of various photocatalysts under irradiation of visible light from a Xe lamp with a Y-48 cut-filter.

| Entry | <sup>a</sup> Light | Photocatalyst              | <sup>b</sup> H <sub>2</sub> formation rate<br>/ μmol h <sup>-1</sup> |
|-------|--------------------|----------------------------|----------------------------------------------------------------------|
| 1     | On                 | Au/CeO <sub>2</sub> :Sr-Pt | 5.6                                                                  |
| 2     | On                 | CeO <sub>2</sub> :Sr-Pt    | N.D.                                                                 |
| 3     | On                 | CeO <sub>2</sub> :Sr       | N.D.                                                                 |
| 4     | -                  | Au/CeO <sub>2</sub> :Sr-Pt | N.D.                                                                 |
| 5     | On                 | -                          | N.D.                                                                 |

<sup>a</sup>Light: irradiation of visible light from Xe lamp with a Y48 filter

<sup>b</sup>Reaction conditions: catalyst, 50 mg; 10 vol% 2-propanol, 5 cm<sup>3</sup>, reaction vessel, Pyrex side irradiation type.
